# Supplementary material
Source: PubMed Central journal article supplement (PMC5666301)
Supplement: NIHMS905963-supplement-Supplemental_file.pdf [file NIHMS905963-supplement-Supplemental_file.pdf]

## Carbon dioxide generation rates for building occupants

Andrew Persily<sup>1</sup> and Lilian de Jonge<sup>2</sup>

<sup>1</sup>National Institute of Standards and Technology, 100 Bureau Drive, MS: 8600, Gaithersburg, MD 20899 USA. Email: andyp@nist.gov

<sup>2</sup>Department of Nutrition and Food Studies, George Mason University, 4400 University Drive, MS: 1F8, Fairfax, VA 22030 USA

### Factors that influencing respiratory quotient

|                                                                                           | <b>Effect on <i>RQ</i></b><br>(↑ increase;<br>↓ decrease) | <b>Reference</b>                                  |
|-------------------------------------------------------------------------------------------|-----------------------------------------------------------|---------------------------------------------------|
| <b>Dietary composition (carbohydrate vs. fat)</b>                                         | ↑ (carbohydrate)<br>↓ (fat)                               | (Toubro et al., 1998b;<br>Schrauwen et al., 1997) |
| Increased glycogen stores - carbs                                                         | ↑                                                         | (Acheson et al., 1988)                            |
| Decreased glycogen stores                                                                 | ↓                                                         | (Acheson et al., 1988)                            |
| Positive energy balance – eat more than burn                                              | ↑                                                         | (Saltzman and Roberts, 1996)                      |
| Negative energy balance                                                                   | ↓                                                         | (Saltzman and Roberts, 1996)                      |
| <b>Increased total fat mass (obesity)</b>                                                 | ↓                                                         | (Schutz et al., 1992; Schutz, 2004)               |
| <b>Growth</b>                                                                             | ↓                                                         | (Stettler et al., 1992)                           |
| <b>Pregnancy</b>                                                                          | ↔ ↑ (3 <sup>rd</sup> trimester)                           | (Melzer et al., 2014)                             |
| Gluconeogenesis - making gluc out of non gluc/protein, not common unless on very low carb | ↓                                                         | (Schutz and Ravussin, 1980)                       |
| De Novo lipogenesis – making fat out non-fat, storage                                     | ↑                                                         | (Schutz, 2004)                                    |
| <b>Chronic training</b>                                                                   | ↓                                                         | (Barwell et al., 2009)                            |
| <b>Genetic factors</b>                                                                    | ↑ ↓                                                       | (Jacobson et al., 2006)                           |
| <b>Type 1 diabetes</b>                                                                    | ↓                                                         | (Wohl et al., 2004)                               |

Exogenous and endogenous factors influencing the *RQ* in acute or chronic conditions.

## Adjustments for air density

As noted in the body of the paper, CO<sub>2</sub> generation rates have historically been presented in volumetric units, e.g. L/s or cfm, generally without discussing the effects of air pressure and temperature. In order to be clear and rigorous, the CO<sub>2</sub> generation rates presented in this paper are based on an air pressure of 101.325 kPa and an air temperature of 273.15 K. Under these conditions, a CO<sub>2</sub> generation rate of 1 L/s equals 0.0446 moles/s or 1.965 g/s. If the volumetric generation rates in this paper are to be used under another set of conditions, the rate must be adjusted for air density using the ideal gas law, as described below. Generations rates in units of moles/s or g/s do not need to be adjusted, which is an advantage to their use.

If a CO<sub>2</sub> generation rate in volumetric units  $G_v$ , calculated using the equations in this paper, is to be used at a set of conditions other than 101.325 kPa and 273.15 K, the following conversion should be employed:

Convert  $G_v$  (L/s) to mole or mass concentrations,  $G_{mole}$  (moles/s) or  $G_{mass}$  (g/s):

$$G_{mole} = 0.0446 G_v$$

$$G_{mass} = 1.965 G_v$$

Calculate  $G_{v,PT}$ , the CO<sub>2</sub> generation rate at another value of air pressure ( $P$  in kPa) and temperature ( $T$  in K)

$$G_{v,PT} = 8.314 G_{mole} T/P$$

In addition, the conversion between volumetric concentration units (e.g. ppm) to mass units (e.g.,  $\mu\text{g}/\text{m}^3$ ) also depends on air pressure and temperature. This conversion is based on the ideal gas law and is conveniently presented in ASHRAE Guideline 28 (ASHRAE 2016). That document presents the following two equations for converting from volume or mole fraction (ppm)  $C_i$  to mass concentrations  $D_i$  ( $\mu\text{g}/\text{m}^3$ ) for species  $i$ :

$$C_i = \left[ \frac{D_i}{M_i} \right] / \left[ \frac{1000P}{(RT)} \right]$$

and

$$D_i = C_i M_i \left[ \frac{1000P}{(RT)} \right]$$

where  $M_i$  is the molecular weight of contaminant  $i$  in kg/kmol,  $P$  is the air pressure in kPa,  $R$  is the universal gas constant (8314 J/kmol•K) and  $T$  is the air temperature in K. For convenience, the ASHRAE guideline has a table of values for  $1000P/RT$  as a function of altitude (from sea level to about 3000 m in roughly 300 m increments) at a temperature of 298.15 K.

### Derivation of Equations 8 through 11

The energy use  $E$  associated with a specific activity, characterized by the dimensionless quantity  $M$ , is given by:

$$E = M \times BMR$$

where  $BMR$  is the basal metabolic rate in units of MJ/day.

Convert  $E$  to kcal/day

$$E = M \times BMR \times (238.8 \text{ kcal/MJ})$$

Calculate the oxygen consumption  $V_{O_2}$  in L/s associated with  $E$  based on the value of 0.206 L of  $O_2$  consumed per kcal of energy, which corresponds to an air pressure of 101.325 kPa and an air temperature of 273.15 K (as described and referenced in body of paper).

$$\begin{aligned} V_{O_2} &= E \times (0.206 \text{ L } O_2 / \text{kcal of energy}) \times (1 \text{ day} / 86400 \text{ s}) \\ &= M \times BMR \times ((238.8 \times 0.206) / 86400) \end{aligned}$$

$$= M \times BMR \times 0.000569$$

The CO<sub>2</sub> generation rate in  $V_{CO_2}$  in L/s is expressed as:

$$V_{CO_2} = RQ \times V_{O_2}$$

$$= RQ \times BMR \times M \times 0.000569 \text{ (Equation 8)}$$

where  $RQ$  is the respiratory quotient. Assuming  $RQ$  equals 0.85, yields:

$$V_{CO_2} = BMR \times M \times 0.000484 \text{ (Equation 9)}$$

At other temperature and pressure conditions, the volume of O<sub>2</sub> consumed per kcal of energy expended must be adjusted for air density. Based on the ideal gas law, the volume  $V_2$  at some pressure  $P_2$  and temperature  $T_2$  for the same amount (moles) of gas is related to the volume  $V_1$  at  $P_1$  and  $T_1$  as follows:

$$V_2/V_1 = (T_2/P_2) / (T_1/P_1)$$

Using 273.15 K and 101.325 kPa for  $T_1$  and  $P_1$  respectively, this expression can be rewritten as:

$$V_2/V_1 = 0.371 (T_2/P_2)$$

Using this relationship, the above equations (8 and 9) become:

$$V_{CO_2} = RQ \times BMR \times M \times (T_2/P_2) \times 0.000211 \text{ (Equation 10)}$$

$$V_{CO_2} = BMR \times M \times (T_2/P_2) \times 0.000179 \text{ (Equation 11)}$$

## REFERENCES

Acheson, K., Schutz, Y., Bessard, T., Anantharaman, K., Flatt, J. and Jequier, E. (1988)

Glycogen storage capacity and de novo lipogenesis during massive carbohydrate overfeeding in man, *American Journal of Clinical Nutrition*, 48, 240–247.

ASHRAE (2016) *Air Quality in Commercial Aircraft*, Atlanta GA, American Society for Heating, Refrigerating and Air-Conditioning Engineers, (Guideline 28-2016).

Barwell, N., Malkova, D., Leggate, M. and Gill, J. (2009) Individual responsiveness to exercise induced fat loss is associated with change in resting substrate utilization, *Metabolism*, 58, 1320–1328.

Jacobson, P., Rankinen, T., Tremblay, A., Perusse, L., Chagnon, Y. and Bouchard, C. (2006) Resting metabolic rate and respiratory quotient: Results from a genome-wide scan in the quebec family study, *American Journal of Clinical Nutrition*, 1527–1533.

Melzer, K., Kayser, B. and Schutz, Y. (2014) Respiratory quotient evolution during normal pregnancy: What nutritional or clinical information can we get out of it?, *European Journal of Obstetrics & Gynecology and Reproductive Biology*, 176, 5–9.

Saltzman, E. and Roberts, S. (1996) Effects of energy imbalance on energy expenditure and respiratory quotient in young and older men: A summary of data from two metabolic studies, *Aging (Milano)*, 370–378.

Schrauwen, P., van Marken Lichtenbelt, W., Saris, W. and Westerterp, K. (1997) Role of glycogen-lowering exercise in the change of fat oxidation in response to a high-fat diet, *American Journal of Physiology*, 273, E623–E629.

Schutz, Y. (2004) Dietary fat, lipogenesis and energy balance, *Physiology & Behavior*, 83, 557–564.

Schutz, Y. and Ravussin, E. (1980) Respiratory quotients lower than 0.70 in ketogenic diets., *American Journal of Clinical Nutrition*, 33, 1317–1319.

Schutz, Y., Tremblay, A., Weinsier, R. and Nelson, K. (1992) Role of fat oxidation in the long-term stabilization of body weight in obese women, *American Journal of Clinical Nutrition*, 55, 670–674.

Stettler, N., Schutz, Y., Micheli, J. and Jequier, E. (1992) Energetic and metabolic cost of growth in gambian infants, *European Journal of Clinical Nutrition*, 46, 329–335.

Toubro, S., Sorensen, T., Hindsberger, C., Christensen, N. and Astrup, A. (1998b) Twenty-four-hour respiratory quotient: The role of diet and familial resemblance, *Journal of Clinical Endocrinology and Metabolism*, 83, 2758–2764.

Wohl, P., Wohl, P., Girman, P. and T, P. (2004) Inflexibility of energy substrate oxidation in type 1 diabetic patients, *Metabolism*, 53, 655–659.
